# Supplementary material for: Magnetic quantitative analysis for multiplex glycoprotein with polymer-based elemental tags
Source: Royal Society of Chemistry journal article supplement (doi:10.1039/c4ja00003j), 2014-01-01

## Magnetic Quantitative Analysis for Multiplex Glycoprotein with Polymer-Based Elemental Tags

Hanyong Peng, Yang Jiao, Xiao Xiao, Beibei Chen, Man He, Zhengru Liu, Xing  
Zhang and Bin Hu\*

Key Laboratory of Analytical Chemistry for Biology and Medicine (Ministry of Education),  
Department of Chemistry, Wuhan University, 430072, China

### Supplemental materials

**Fig. S1.**  $^1\text{H}$  NMR spectroscopy of the synthesized polymer in  $\text{D}_2\text{O}$ .

**Fig. S2.** Effect of molar ratio between PAA and antibody.

**Fig. S3.** Comparison of PAA and DTPA-based methods used to label the same amount protein under respective optimized condition.

**Fig. S4.** Effect of blocking time. Sample volume: 200  $\mu\text{L}$ ; Concentration of HP, HPX, OVA: 10  $\text{ng mL}^{-1}$ ; blocking buffer: 50  $\mu\text{L}$

**Fig. S5.** Effect of sample volume on the signal intensity of metal ions. Concentration of HP, HPX, OVA: 10  $\text{ng mL}^{-1}$ ; blocking buffer: 50  $\mu\text{L}$

**Fig. S6.** Effect of eluent volume on the signal intensity of metal ions. Each time 15  $\mu\text{L}$ , sample volume: 200  $\mu\text{L}$ ; Concentration of HP, HPX, OVA: 10  $\text{ng mL}^{-1}$ ; blocking buffer: 50  $\mu\text{L}$

Fig. S1

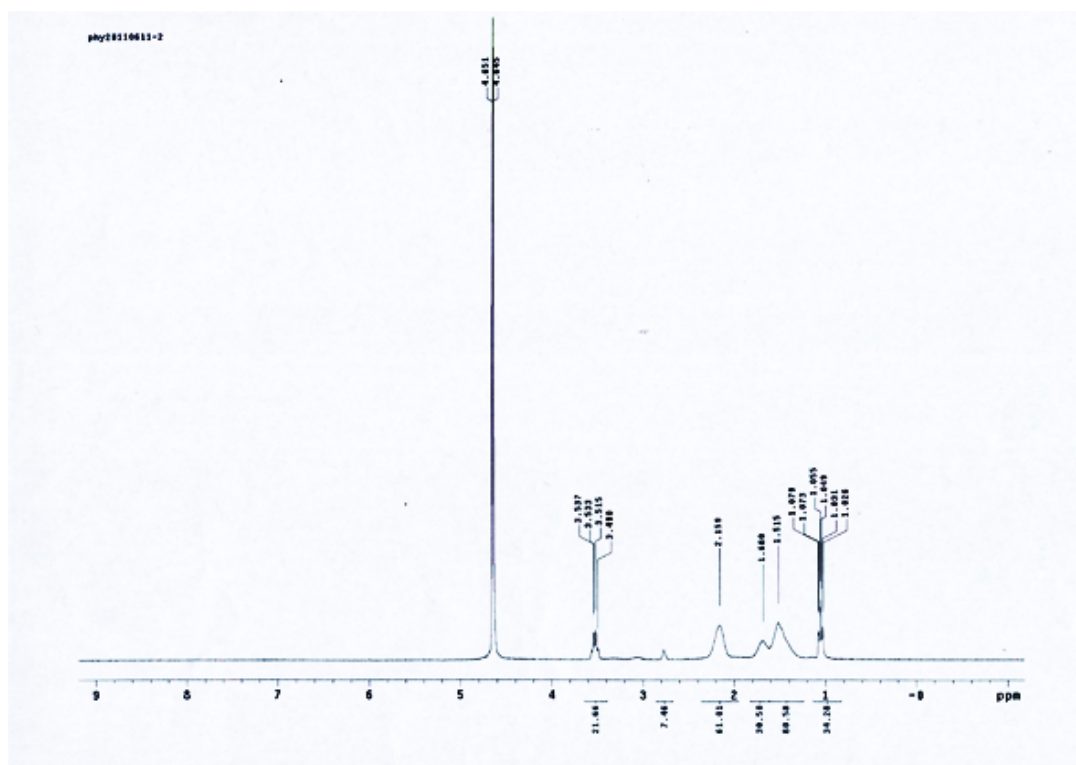

**Fig. S2**

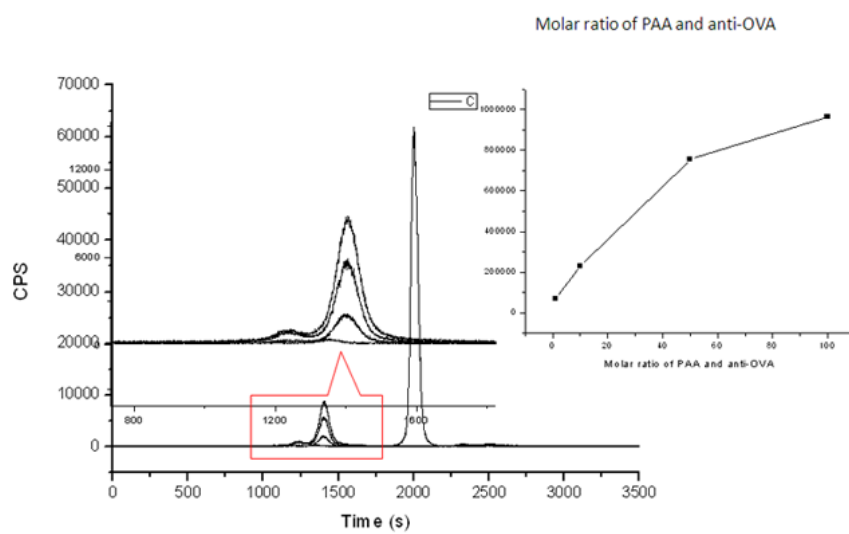

Fig. S3

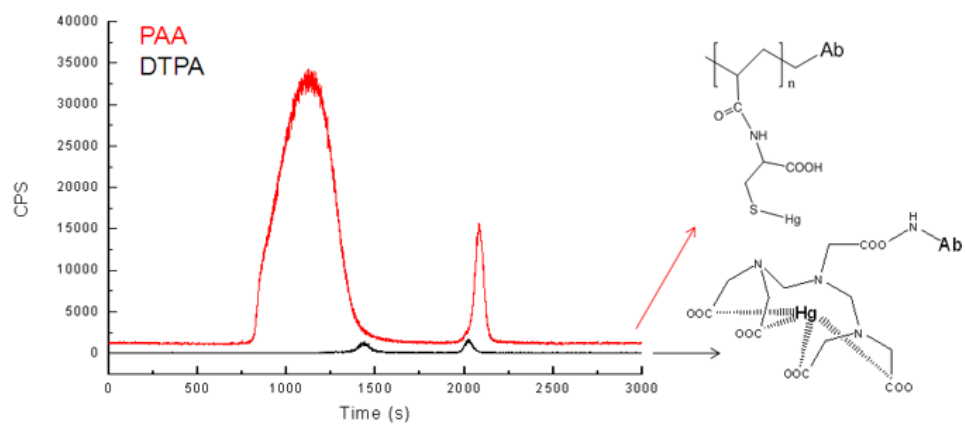

Fig. S4

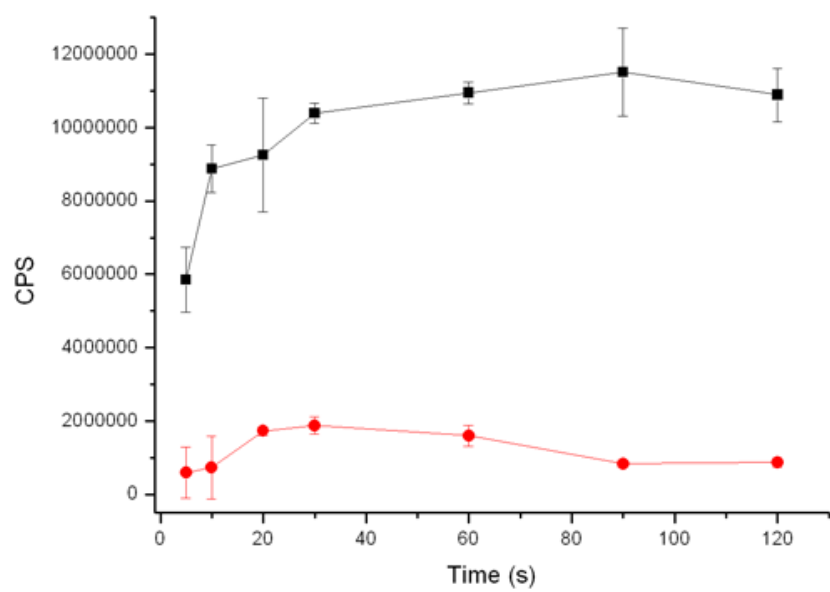

Fig. S5

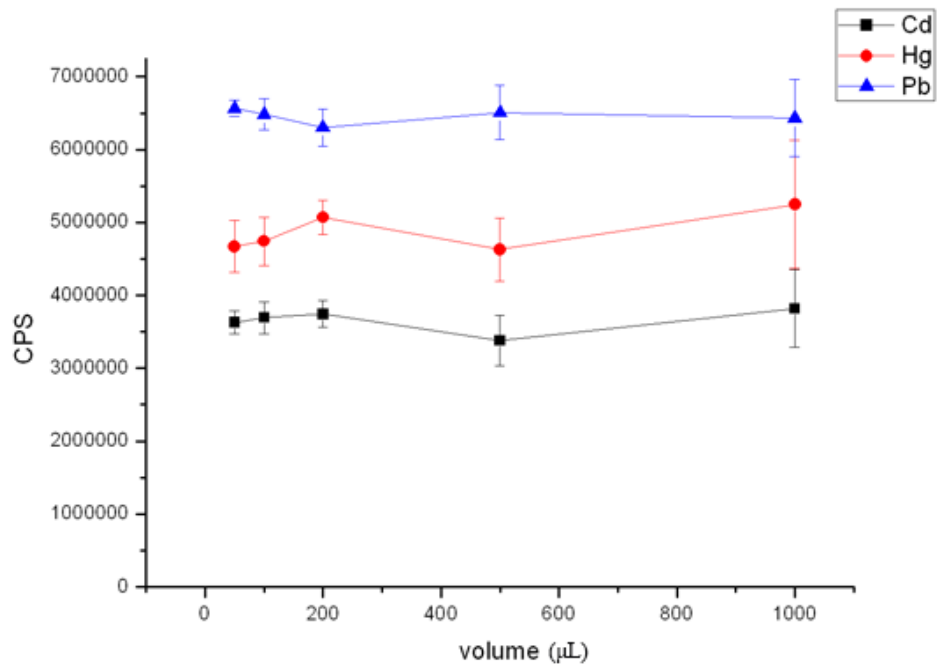

**Fig. S6**

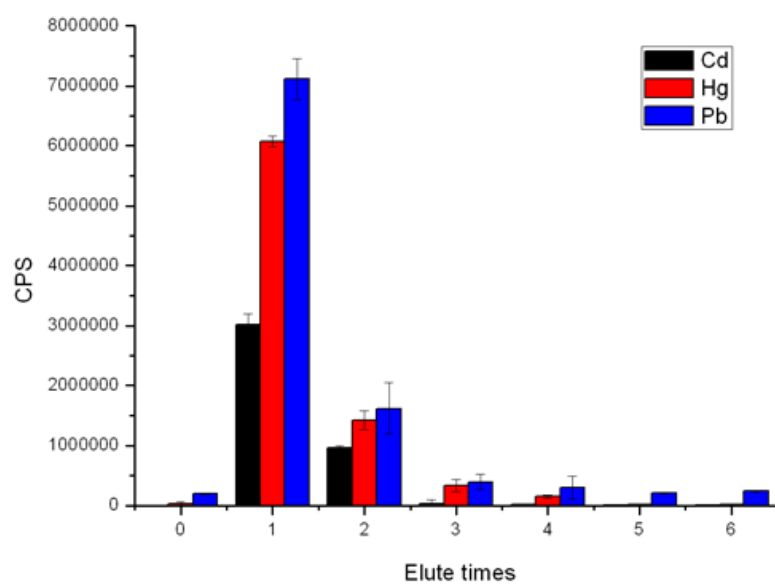

Supplement: c4ja00003j1.pdf [file c4ja00003j1.pdf]
